# Supplementary material for: RedDB, a computational database of electroactive molecules for aqueous redox flow batteries
Source: PubMed Central journal article supplement (PMC9705518; doi:10.1038/s41597-022-01832-2), 2022-11-28
Supplement: 41597_2022_1832_MOESM1_ESM.pdf [file 41597_2022_1832_MOESM1_ESM.pdf]

# Supplementary Information

## RedDB, a computational database of electroactive molecules for aqueous redox flow batteries

Elif Sorkun<sup>1</sup>, Qi Zhang<sup>1</sup>, Abhishek Khetan<sup>1</sup>, Murat Cihan Sorkun<sup>1</sup>, and Süleyman Er<sup>1</sup>

### Contents

|   |          |   |
|---|----------|---|
| 1 | Table S1 | 2 |
| 2 | Table S2 | 4 |

---

<sup>1</sup>DIFFER – Dutch Institute for Fundamental Energy Research, De Zaale 20, 5612 AJ Eindhoven, the Netherlands.

# 1 Table S1

| Table Name          | Column Name           | Column Description                                                | Unit           |
|---------------------|-----------------------|-------------------------------------------------------------------|----------------|
| 17*atomicproperties | id                    | Unique ID for atomicproperties table                              |                |
|                     | atom                  | Chemical element symbol                                           |                |
|                     | atomId                | The ID of atom in the job                                         |                |
|                     | input_X               | Numerical coordinate of atom position with reference to X axis    | Å              |
|                     | input_Y               | Numerical coordinate of atom position with reference to Y axis    | Å              |
|                     | input_Z               | Numerical coordinate of atom position with reference to Z axis    | Å              |
|                     | nmrIsotropicshielding | Isotropic NMR chemical shielding of the atom                      | ppm            |
|                     | nmrAnisotropy         | Anisotropic NMR chemical shielding of the atom                    | ppm            |
|                     | homo_f_NN             | f-NN-HOMO Fukui indice of the atom                                | Hartree        |
|                     | homo_f_NS             | f-NS-HOMO Fukui indice of the atom                                | Hartree        |
|                     | homo_f_SN             | f-SN-HOMO Fukui indice of the atom                                | Hartree        |
|                     | homo_f_SS             | f-SS-HOMO Fukui indice of the atom                                | Hartree        |
|                     | lumo_f_NN             | f-NN-LUMO Fukui indice of the atom                                | Hartree        |
|                     | lumo_f_NS             | f-NS-LUMO Fukui indice of the atom                                | Hartree        |
|                     | lumo_f_SN             | f-SN-LUMO Fukui indice of the atom                                | Hartree        |
|                     | lumo_f_SS             | f-SS-LUMO Fukui indice of the atom                                | Hartree        |
|                     | job.id                | Job ID of the calculation that the data was taken from            |                |
| 5*cpolarcalc        | id                    | Unique ID for cpolarcalc table                                    |                |
|                     | alpha                 | Polarizability quantity of $\alpha$ from cpolar calculation       | au             |
|                     | dalpha                | Polarizability quantity of $\Delta\alpha$ from cpolar calculation | au             |
|                     | beta                  | Average hyperpolarizability $\beta$ from cpolar calculation       | au             |
|                     | job.id                | Job ID of the calculation that the data was taken from            |                |
| 2*functionalgroup   | id                    | Unique ID for functionalgroup table                               |                |
|                     | stoichiometry         | Stoichiometry of functional groups                                |                |
| 13*job              | id                    | Unique ID for job table                                           |                |
|                     | jobType               | Type of calculation (SPE or OPT)                                  |                |
|                     | calcNumber            | Calculation Number                                                |                |
|                     | jobId                 | Unique ID of the job as given by Jaguar                           |                |
|                     | name                  | Name of the job file                                              |                |
|                     | path                  | Directory path of the job file                                    |                |
|                     | reactionStep          | Reaction Step Number                                              |                |
|                     | dataPackage_id        | ID of the data package with respective values shown in Fig. ??    |                |
|                     | functionalGroup_id    | Chemical functional group ID                                      |                |
|                     | jobSetting_id         | Job settings ID                                                   |                |
|                     | molecule_id           | Molecule ID                                                       |                |
|                     | moleculeInfo_id       | Molecule info ID                                                  |                |
|                     | user_id               | User ID                                                           |                |
| 14*jobsetting       | id                    | Unique ID for jobsetting table                                    |                |
|                     | basisSet              | Basis set                                                         |                |
|                     | netMolecularCharge    | Net molecular charge                                              | e              |
|                     | multiplicity          | Multiplicity                                                      |                |
|                     | solvent               | Solvent information                                               |                |
|                     | scfCalculation        | SCF calculation information                                       |                |
|                     | dft                   | DFT calculation information                                       |                |
|                     | solvationEnergy       | Solvation method calculation information                          |                |
|                     | hyperPolEqu           | (Hyper) polarizabilities equation name                            |                |
|                     | maxScfIterations      | Maximum number of SCF iterations                                  |                |
|                     | internalDielectric    | Internal dielectric constant                                      |                |
|                     | continuumDielectric   | Continuum dielectric constant                                     |                |
|                     | solventProbe          | Solvent probe molecule radius                                     | Å <sup>2</sup> |
|                     | pbfVersion            | PBF model version information                                     |                |
| 4*molecule          | id                    | Unique ID for molecule table                                      |                |
|                     | smiles                | SMILES representation of the molecule                             |                |
|                     | inchiKey              | InChIKey representation of the molecule                           |                |

|                |                         |                                                                  |                |
|----------------|-------------------------|------------------------------------------------------------------|----------------|
|                | parentMolecule_id       | Molecule ID of the parent (core) molecule                        |                |
| 3*moleculeinfo | id                      | Unique ID for moleculeinfo table                                 |                |
|                | molecularWeight         | Total weight of the molecule                                     | amu            |
|                | stoichiometry           | Composition stoichiometry of the molecule                        |                |
| 7*optimization | id                      | Unique ID for reaction table                                     |                |
|                | convergence             | The quality of the converged structure (i.e. 0,1,2,3,4)          |                |
|                | optGasEnergy            | Total energy of the molecule in gas phase from OPT               | Hartree        |
|                | optGasHomo              | HOMO energy of the molecule in gas phase from OPT                | Hartree        |
|                | optGasLumo              | LUMO energy of the molecule in gas phase from OPT                | Hartree        |
|                | optGasIterationNumber   | Number of SCF iterations for gas phase calculation from OPT      |                |
|                | job_id                  | Job ID of the calculation that the data was taken from           |                |
| 6*pbfcalc      | id                      | Unique ID for pbfcalc table                                      |                |
|                | job_id                  | Job ID of the calculation that the data was taken from           |                |
|                | cavityEnergy            | Cavity energy of the molecule                                    | kT             |
|                | molecularSurface        | Molecule surface area                                            | Å <sup>2</sup> |
|                | reactionFieldEnergy     | Reaction field energy                                            | kT             |
|                | solventAccessSurface    | Solvent accessible surface                                       | Å <sup>2</sup> |
| 8*reaction     | id                      | Unique ID for reaction table                                     |                |
|                | bondType                | Type of redox reaction                                           |                |
|                | pairPackage_id          | ID of the data package containing reaction information           |                |
|                | product_id              | Product molecule ID of the redox reaction                        |                |
|                | reactant_id             | Reactant molecule ID of the redox reaction                       |                |
|                | reactionEnergy          | Reaction energy of the redox reaction                            | Hartree        |
|                | productEnergy           | Total energy of the product molecule                             | Hartree        |
|                | reactantEnergy          | Total energy of the reactant molecule                            | Hartree        |
| 3*solubility   | id                      | Unique ID for solubility table                                   |                |
|                | molecule_id             | Molecule ID                                                      |                |
|                | solubilityAqSolPred     | Predicted solubility value                                       | logS           |
| 10*scfcalc     | id                      | Unique ID for scfcalc table                                      |                |
|                | gasEnergy               | Total energy of the molecule in gas phase from SPE               | Hartree        |
|                | gasIterationNumber      | Number of SCF iterations for gas phase calculation from SPE      |                |
|                | gasHomo                 | HOMO energy of the molecule in gas phase from SPE                | Hartree        |
|                | gasLumo                 | LUMO energy of the molecule in gas phase from SPE                | Hartree        |
|                | solutionEnergy          | Total energy of the molecule in solution phase from SPE          | Hartree        |
|                | solutionIterationNumber | Number of SCF iterations for solution phase calculation from SPE |                |
|                | solutionHomo            | HOMO energy of the molecule in solution phase from SPE           | Hartree        |
|                | solutionLumo            | LUMO energy of the molecule in solution phase from SPE           | Hartree        |
|                | job_id                  | Job ID of the calculation that the data was taken from           |                |

Table S1: RedDB's most essential data tables. The names and brief descriptions of the data columns, which are specific to each data table, have been provided. In addition, for every data column, the applicable units for the stored data have been shown.

## 2 Table S2

| Table Name           | Column Name                | Column Description                                                       | Unit    |
|----------------------|----------------------------|--------------------------------------------------------------------------|---------|
| otherinfo            | id                         | Unique ID for otherinfo table                                            |         |
|                      | jobId.id                   | Job ID of the calculation that the data was taken from                   |         |
|                      | molecularPointGroup        | Molecular Point Group                                                    |         |
|                      | nuclearRepulsionEnergy     | Nuclear Repulsion Energy                                                 | Hartree |
|                      | pointGroupUsed             | Point Group Used                                                         |         |
| optimizationgeometry | id                         | Unique ID for optimizationgeometry table                                 |         |
|                      | jobId.id                   | Job ID of the calculation that the data was taken from                   |         |
|                      | atom                       | Chemical element symbol                                                  |         |
|                      | atomId                     | The ID of the atom in the job                                            |         |
|                      | input_X                    | Numerical coordinate of atom position with reference to X axis           | Å       |
|                      | input_Y                    | Numerical coordinate of atom position with reference to Y axis           | Å       |
|                      | input_Z                    | Numerical coordinate of atom position with reference to Z axis           | Å       |
|                      | final_X                    | Optimized numerical coordinate of atom position with reference to X axis | Å       |
|                      | final_Y                    | Optimized numerical coordinate of atom position with reference to Y axis | Å       |
|                      | final_Z                    | Optimized numerical coordinate of atom position with reference to Z axis | Å       |
| chcalc               | id                         | Unique ID for chcalc table                                               |         |
|                      | jobId.id                   | Job ID of the calculation that the data was taken from                   |         |
|                      | mqmwGasPossibleMaximum     | Gridpoints possible maximum in gas phase                                 |         |
|                      | mqmwGasGridpointsChargeFit | Gridpoints used for charge fit in gas phase                              |         |
|                      | mqmwPossibleMaximum        | Gridpoints possible maximum in solution phase                            |         |
|                      | mqmwGridpointsChargeFit    | Gridpoints used for charge fit in solution phase                         |         |
|                      | mqmwGasDipoleMomentsTot    | Total dipole moments from quantum mechanical wavefunction in gas phase   | Debye   |
|                      | mqmwGasDipoleMomentsX      | X dipole moments from quantum mechanical wavefunction in gas phase       | Debye   |
|                      | mqmwGasDipoleMomentsY      | Y dipole moments from quantum mechanical wavefunction in gas phase       | Debye   |
|                      | mqmwGasDipoleMomentsZ      | Z dipole moments from quantum mechanical wavefunction in gas phase       | Debye   |
|                      | mqmwGasQuadrupoleMomentsXX | XX quadrupole moments from quantum mechanical wavefunction in gas phase  | Debye-Å |
|                      | mqmwGasQuadrupoleMomentsXY | XY quadrupole moments from quantum mechanical wavefunction in gas phase  | Debye-Å |
|                      | mqmwGasQuadrupoleMomentsXZ | XZ quadrupole moments from quantum mechanical wavefunction in gas phase  | Debye-Å |
|                      | mqmwGasQuadrupoleMomentsYY | YY quadrupole moments from quantum mechanical wavefunction in gas phase  | Debye-Å |
|                      | mqmwGasQuadrupoleMomentsYZ | YZ quadrupole moments from quantum mechanical wavefunction in gas phase  | Debye-Å |
|                      | mqmwGasQuadrupoleMomentsZZ | ZZ quadrupole moments from quantum mechanical wavefunction in gas phase  | Debye-Å |

|                                   |                                                                                          |                      |
|-----------------------------------|------------------------------------------------------------------------------------------|----------------------|
| mqmwGasTracelessQuadrupoleXY      | XY traceless quadrupole moments from quantum mechanical wavefunction in gas phase        | Debye-Å              |
| mqmwGasTracelessQuadrupoleXZ      | XZ traceless quadrupole moments from quantum mechanical wavefunction in gas phase        | Debye-Å              |
| mqmwGasTracelessQuadrupoleYZ      | YZ traceless quadrupole moments from quantum mechanical wavefunction in gas phase        | Debye-Å              |
| mqmwGasTracelessQuadrupoleXXYY    | XX-YY traceless quadrupole moments from quantum mechanical wavefunction in gas phase     | Debye-Å              |
| mqmwGasTracelessQuadrupole2ZZXXYY | 2ZZ-XX-YY traceless quadrupole moments from quantum mechanical wavefunction in gas phase | Debye-Å              |
| mqmwGasOctapoleMomentsXXX         | XXX octapole moments from quantum mechanical wavefunction in gas phase                   | Debye-Å <sup>2</sup> |
| mqmwGasOctapoleMomentsXXY         | XXY octapole moments from quantum mechanical wavefunction in gas phase                   | Debye-Å <sup>2</sup> |
| mqmwGasOctapoleMomentsXXZ         | XXZ octapole moments from quantum mechanical wavefunction in gas phase                   | Debye-Å <sup>2</sup> |
| mqmwGasOctapoleMomentsXYY         | XYY octapole moments from quantum mechanical wavefunction in gas phase                   | Debye-Å <sup>2</sup> |
| mqmwGasOctapoleMomentsXYZ         | XYZ octapole moments from quantum mechanical wavefunction in gas phase                   | Debye-Å <sup>2</sup> |
| mqmwGasOctapoleMomentsXZZ         | XZZ octapole moments from quantum mechanical wavefunction in gas phase                   | Debye-Å <sup>2</sup> |
| mqmwGasOctapoleMomentsYYY         | YYY octapole moments from quantum mechanical wavefunction in gas phase                   | Debye-Å <sup>2</sup> |
| mqmwGasOctapoleMomentsYYZ         | YYZ octapole moments from quantum mechanical wavefunction in gas phase                   | Debye-Å <sup>2</sup> |
| mqmwGasOctapoleMomentsYZZ         | YZZ octapole moments from quantum mechanical wavefunction in gas phase                   | Debye-Å <sup>2</sup> |
| mqmwGasOctapoleMomentsZZZ         | ZZZ octapole moments from quantum mechanical wavefunction in gas phase                   | Debye-Å <sup>2</sup> |
| mqmwGasTracelessOctapoleXXX       | XXX traceless octapole moments from quantum mechanical wavefunction in gas phase         | Debye-Å <sup>2</sup> |
| mqmwGasTracelessOctapoleXYZ       | XYZ traceless octapole moments from quantum mechanical wavefunction in gas phase         | Debye-Å <sup>2</sup> |
| mqmwGasTracelessOctapoleYYY       | YYY traceless octapole moments from quantum mechanical wavefunction in gas phase         | Debye-Å <sup>2</sup> |
| mqmwGasTracelessOctapoleZZZ       | ZZZ traceless octapole moments from quantum mechanical wavefunction in gas phase         | Debye-Å <sup>2</sup> |
| mqmwGasTracelessOctapoleXXYYZZ    | XXY-YZZ traceless octapole moments from quantum mechanical wavefunction in gas phase     | Debye-Å <sup>2</sup> |
| mqmwGasTracelessOctapoleXXZYYZ    | XXZ-YYZ traceless octapole moments from quantum mechanical wavefunction in gas phase     | Debye-Å <sup>2</sup> |
| mqmwGasTracelessOctapoleXYYXZZ    | XYY-XZZ traceless octapole moments from quantum mechanical wavefunction in gas phase     | Debye-Å <sup>2</sup> |
| mqmwGasHexadecapoleMomentsXXXX    | XXXX hexadecapole moments from quantum mechanical wavefunction in gas phase              | Debye-Å <sup>3</sup> |
| mqmwGasHexadecapoleMomentsXXXYY   | XXXYY hexadecapole moments from quantum mechanical wavefunction in gas phase             | Debye-Å <sup>3</sup> |
| mqmwGasHexadecapoleMomentsXXXZZ   | XXXZZ hexadecapole moments from quantum mechanical wavefunction in gas phase             | Debye-Å <sup>3</sup> |

|                                 |                                                                                          |                       |
|---------------------------------|------------------------------------------------------------------------------------------|-----------------------|
| mqmwGasHexadecapoleMomentsXXYY  | XXYY hexadecapole moments from quantum mechanical wavefunction in gas phase              | Debye- $\text{\AA}^3$ |
| mqmwGasHexadecapoleMomentsXXYZ  | XXYZ hexadecapole moments from quantum mechanical wavefunction in gas phase              | Debye- $\text{\AA}^3$ |
| mqmwGasHexadecapoleMomentsXXZZ  | XXZZ hexadecapole moments from quantum mechanical wavefunction in gas phase              | Debye- $\text{\AA}^3$ |
| mqmwGasHexadecapoleMomentsYYXZ  | YYXZ hexadecapole moments from quantum mechanical wavefunction in gas phase              | Debye- $\text{\AA}^3$ |
| mqmwGasHexadecapoleMomentsYYYYX | YYYYX hexadecapole moments from quantum mechanical wavefunction in gas phase             | Debye- $\text{\AA}^3$ |
| mqmwGasHexadecapoleMomentsYYYYY | YYYYY hexadecapole moments from quantum mechanical wavefunction in gas phase             | Debye- $\text{\AA}^3$ |
| mqmwGasHexadecapoleMomentsYYYYZ | YYYYZ hexadecapole moments from quantum mechanical wavefunction in gas phase             | Debye- $\text{\AA}^3$ |
| mqmwGasHexadecapoleMomentsYYZZ  | YYZZ hexadecapole moments from quantum mechanical wavefunction in gas phase              | Debye- $\text{\AA}^3$ |
| mqmwGasHexadecapoleMomentsZZXY  | ZZXY hexadecapole moments from quantum mechanical wavefunction in gas phase              | Debye- $\text{\AA}^3$ |
| mqmwGasHexadecapoleMomentsZZZX  | ZZZX hexadecapole moments from quantum mechanical wavefunction in gas phase              | Debye- $\text{\AA}^3$ |
| mqmwGasHexadecapoleMomentsZZZY  | ZZZY hexadecapole moments from quantum mechanical wavefunction in gas phase              | Debye- $\text{\AA}^3$ |
| mqmwGasHexadecapoleMomentsZZZZ  | ZZZZ hexadecapole moments from quantum mechanical wavefunction in gas phase              | Debye- $\text{\AA}^3$ |
| mqmwDipoleMomentsTot            | Total dipole moments from quantum mechanical wavefunction in solution phase              | Debye                 |
| mqmwDipoleMomentsX              | X dipole moments from quantum mechanical wavefunction in solution phase                  | Debye                 |
| mqmwDipoleMomentsY              | Y dipole moments from quantum mechanical wavefunction in solution phase                  | Debye                 |
| mqmwDipoleMomentsZ              | Z dipole moments from quantum mechanical wavefunction in solution phase                  | Debye                 |
| mqmwQuadrupoleMomentsXX         | XX quadrupole moments from quantum mechanical wavefunction in solution phase             | Debye- $\text{\AA}$   |
| mqmwQuadrupoleMomentsXY         | XY quadrupole moments from quantum mechanical wavefunction in solution phase             | Debye- $\text{\AA}$   |
| mqmwQuadrupoleMomentsXZ         | XZ quadrupole moments from quantum mechanical wavefunction in solution phase             | Debye- $\text{\AA}$   |
| mqmwQuadrupoleMomentsYY         | YY quadrupole moments from quantum mechanical wavefunction in solution phase             | Debye- $\text{\AA}$   |
| mqmwQuadrupoleMomentsYZ         | YZ quadrupole moments from quantum mechanical wavefunction in solution phase             | Debye- $\text{\AA}$   |
| mqmwQuadrupoleMomentsZZ         | ZZ quadrupole moments from quantum mechanical wavefunction in solution phase             | Debye- $\text{\AA}$   |
| mqmwTracelessQuadrupoleXY       | XY traceless quadrupole moments from quantum mechanical wavefunction for solution        | Debye- $\text{\AA}$   |
| mqmwTracelessQuadrupoleXZ       | XZ traceless quadrupole moments from quantum mechanical wavefunction for solution        | Debye- $\text{\AA}$   |
| mqmwTracelessQuadrupoleYZ       | YZ traceless quadrupole moments from quantum mechanical wavefunction for solution        | Debye- $\text{\AA}$   |
| mqmwTracelessQuadrupoleXXYY     | XX-YY traceless quadrupole moments from quantum mechanical wavefunction for solution     | Debye- $\text{\AA}$   |
| mqmwTracelessQuadrupol2ZZXXYY   | 2ZZ-XX-YY traceless quadrupole moments from quantum mechanical wavefunction for solution | Debye- $\text{\AA}$   |

|                             |                                                                                           |                       |
|-----------------------------|-------------------------------------------------------------------------------------------|-----------------------|
| mqmwOctapoleMomentsXXX      | XXX octapole moments from quantum mechanical wavefunction in solution phase               | Debye- $\text{\AA}^2$ |
| mqmwOctapoleMomentsXXY      | XXY octapole moments from quantum mechanical wavefunction in solution phase               | Debye- $\text{\AA}^2$ |
| mqmwOctapoleMomentsXXZ      | XXZ octapole moments from quantum mechanical wavefunction in solution phase               | Debye- $\text{\AA}^2$ |
| mqmwOctapoleMomentsXYY      | XYY octapole moments from quantum mechanical wavefunction in solution phase               | Debye- $\text{\AA}^2$ |
| mqmwOctapoleMomentsXYZ      | XYZ octapole moments from quantum mechanical wavefunction in solution phase               | Debye- $\text{\AA}^2$ |
| mqmwOctapoleMomentsXZZ      | XZZ octapole moments from quantum mechanical wavefunction in solution phase               | Debye- $\text{\AA}^2$ |
| mqmwOctapoleMomentsYYY      | YYY octapole moments from quantum mechanical wavefunction in solution phase               | Debye- $\text{\AA}^2$ |
| mqmwOctapoleMomentsYYZ      | YYZ octapole moments from quantum mechanical wavefunction in solution phase               | Debye- $\text{\AA}^2$ |
| mqmwOctapoleMomentsYZZ      | YZZ octapole moments from quantum mechanical wavefunction in solution phase               | Debye- $\text{\AA}^2$ |
| mqmwOctapoleMomentsZZZ      | ZZZ octapole moments from quantum mechanical wavefunction in solution phase               | Debye- $\text{\AA}^2$ |
| mqmwTracelessOctapoleXXX    | XXX traceless octapole moments from quantum mechanical wavefunction in solution phase     | Debye- $\text{\AA}^2$ |
| mqmwTracelessOctapoleYYY    | YYY traceless octapole moments from quantum mechanical wavefunction in solution phase     | Debye- $\text{\AA}^2$ |
| mqmwTracelessOctapoleZZZ    | ZZZ traceless octapole moments from quantum mechanical wavefunction in solution phase     | Debye- $\text{\AA}^2$ |
| mqmwTracelessOctapoleXYZ    | XYZ traceless octapole moments from quantum mechanical wavefunction in solution phase     | Debye- $\text{\AA}^2$ |
| mqmwTracelessOctapoleXXYYZZ | XXY-YZZ traceless octapole moments from quantum mechanical wavefunction in solution phase | Debye- $\text{\AA}^2$ |
| mqmwTracelessOctapoleXXZYYZ | XXZ-YYZ traceless octapole moments from quantum mechanical wavefunction in solution phase | Debye- $\text{\AA}^2$ |
| mqmwTracelessOctapoleXYYXZZ | XYY-XZZ traceless octapole moments from quantum mechanical wavefunction in solution phase | Debye- $\text{\AA}^2$ |
| mqmwHexadecapoleMomentsXXXX | XXXX hexadecapole moments from quantum mechanical wavefunction in solution phase          | Debye- $\text{\AA}^3$ |
| mqmwHexadecapoleMomentsXXXY | XXX Y hexadecapole moments from quantum mechanical wavefunction in solution phase         | Debye- $\text{\AA}^3$ |
| mqmwHexadecapoleMomentsXXXZ | XXX Z hexadecapole moments from quantum mechanical wavefunction in solution phase         | Debye- $\text{\AA}^3$ |
| mqmwHexadecapoleMomentsXXYY | XX YY hexadecapole moments from quantum mechanical wavefunction in solution phase         | Debye- $\text{\AA}^3$ |
| mqmwHexadecapoleMomentsXXYZ | XX YZ hexadecapole moments from quantum mechanical wavefunction in solution phase         | Debye- $\text{\AA}^3$ |
| mqmwHexadecapoleMomentsXXZZ | XX ZZ hexadecapole moments from quantum mechanical wavefunction in solution phase         | Debye- $\text{\AA}^3$ |

|                                  |                                                                                        |                       |
|----------------------------------|----------------------------------------------------------------------------------------|-----------------------|
| mqmwHexadecapoleMomentsYXXZ      | YXXZ hexadecapole moments from quantum mechanical wavefunction in solution phase       | Debye- $\text{\AA}^3$ |
| mqmwHexadecapoleMomentsYYYY      | YYYY hexadecapole moments from quantum mechanical wavefunction in solution phase       | Debye- $\text{\AA}^3$ |
| mqmwHexadecapoleMomentsYYYY      | YYYY hexadecapole moments from quantum mechanical wavefunction in solution phase       | Debye- $\text{\AA}^3$ |
| mqmwHexadecapoleMomentsYYYZ      | YYYZ hexadecapole moments from quantum mechanical wavefunction in solution phase       | Debye- $\text{\AA}^3$ |
| mqmwHexadecapoleMomentsYYZZ      | YYZZ hexadecapole moments from quantum mechanical wavefunction in solution phase       | Debye- $\text{\AA}^3$ |
| mqmwHexadecapoleMomentsZZXY      | ZZXY hexadecapole moments from quantum mechanical wavefunction in solution phase       | Debye- $\text{\AA}^3$ |
| mqmwHexadecapoleMomentsZZZX      | ZZZX hexadecapole moments from quantum mechanical wavefunction in solution phase       | Debye- $\text{\AA}^3$ |
| mqmwHexadecapoleMomentsZZZY      | ZZZY hexadecapole moments from quantum mechanical wavefunction in solution phase       | Debye- $\text{\AA}^3$ |
| mqmwHexadecapoleMomentsZZZZ      | ZZZZ hexadecapole moments from quantum mechanical wavefunction in solution phase       | Debye- $\text{\AA}^3$ |
| mepcGasDipoleMomentsTot          | Total dipole moment from electrostatic potential charges in gas phase                  | Debye                 |
| mepcGasDipoleMomentsX            | X dipole moment from electrostatic potential charges in gas phase                      | Debye                 |
| mepcGasDipoleMomentsY            | Y dipole moment from electrostatic potential charges in gas phase                      | Debye                 |
| mepcGasDipoleMomentsZ            | Z dipole moment from electrostatic potential charges in gas phase                      | Debye                 |
| mepcGasQuadrupoleMomentsXX       | XX quadrupole moment from electrostatic potential charges in gas phase                 | Debye- $\text{\AA}$   |
| mepcGasQuadrupoleMomentsXY       | XY quadrupole moment from electrostatic potential charges in gas phase                 | Debye- $\text{\AA}$   |
| mepcGasQuadrupoleMomentsXZ       | XZ quadrupole moment from electrostatic potential charges in gas phase                 | Debye- $\text{\AA}$   |
| mepcGasQuadrupoleMomentsYY       | YY quadrupole moment from electrostatic potential charges in gas phase                 | Debye- $\text{\AA}$   |
| mepcGasQuadrupoleMomentsYZ       | YZ quadrupole moment from electrostatic potential charges in gas phase                 | Debye- $\text{\AA}$   |
| mepcGasQuadrupoleMomentsZZ       | ZZ quadrupole moment from electrostatic potential charges in gas phase                 | Debye- $\text{\AA}$   |
| mepcGasTracelessQuadrupoleXY     | XY traceless quadrupole moment from electrostatic potential charges in gas phase       | Debye- $\text{\AA}$   |
| mepcGasTracelessQuadrupoleXZ     | XZ traceless quadrupole moment from electrostatic potential charges in gas phase       | Debye- $\text{\AA}$   |
| mepcGasTracelessQuadrupoleYZ     | YZ traceless quadrupole moment from electrostatic potential charges in gas phase       | Debye- $\text{\AA}$   |
| mepcGasTracelessQuadrupoleXXYY   | XX-YY traceless quadrupole moment from electrostatic potential charges in gas phase    | Debye- $\text{\AA}$   |
| mepcGasTracelessQuadrupoleZZXXYY | ZZ-XX-YY traceless quadrupole moment from electrostatic potential charges in gas phase | Debye- $\text{\AA}$   |
| mepcGasOctapoleMomentsXXX        | XXX octapole moment from electrostatic potential charges in gas phase                  | Debye- $\text{\AA}^2$ |
| mepcGasOctapoleMomentsXXY        | XXY octapole moment from electrostatic potential charges in gas phase                  | Debye- $\text{\AA}^2$ |
| mepcGasOctapoleMomentsXXZ        | XXZ octapole moment from electrostatic potential charges in gas phase                  | Debye- $\text{\AA}^2$ |



|                                 |                                                                                     |                       |
|---------------------------------|-------------------------------------------------------------------------------------|-----------------------|
| mepcGasOctapoleMomentsXYY       | XYY octapole moment from electrostatic potential charges in gas phase               | Debye- $\text{\AA}^2$ |
| mepcGasOctapoleMomentsXYZ       | XYZ octapole moment from electrostatic potential charges in gas phase               | Debye- $\text{\AA}^2$ |
| mepcGasOctapoleMomentsXZZ       | XZZ octapole moment from electrostatic potential charges in gas phase               | Debye- $\text{\AA}^2$ |
| mepcGasOctapoleMomentsYYY       | YYY octapole moment from electrostatic potential charges in gas phase               | Debye- $\text{\AA}^2$ |
| mepcGasOctapoleMomentsYYZ       | YYZ octapole moment from electrostatic potential charges in gas phase               | Debye- $\text{\AA}^2$ |
| mepcGasOctapoleMomentsYZZ       | YZZ octapole moment from electrostatic potential charges in gas phase               | Debye- $\text{\AA}^2$ |
| mepcGasOctapoleMomentsZZZ       | ZZZ octapole moment from electrostatic potential charges in gas phase               | Debye- $\text{\AA}^2$ |
| mepcGasTracelessOctapoleXXX     | XXX traceless octapole moment from electrostatic potential charges in gas phase     | Debye- $\text{\AA}^2$ |
| mepcGasTracelessOctapoleYYY     | YYY traceless octapole moment from electrostatic potential charges in gas phase     | Debye- $\text{\AA}^2$ |
| mepcGasTracelessOctapoleZZZ     | ZZZ traceless octapole moment from electrostatic potential charges in gas phase     | Debye- $\text{\AA}^2$ |
| mepcGasTracelessOctapoleXYZ     | XYZ traceless octapole moment from electrostatic potential charges in gas phase     | Debye- $\text{\AA}^2$ |
| mepcGasTracelessOctapoleXXYYZZ  | XXY-YYZ traceless octapole moment from electrostatic potential charges in gas phase | Debye- $\text{\AA}^2$ |
| mepcGasTracelessOctapoleXXZYYZ  | XXZ-YYZ traceless octapole moment from electrostatic potential charges in gas phase | Debye- $\text{\AA}^2$ |
| mepcGasTracelessOctapoleXYYXZZ  | XYY-XZZ traceless octapole moment from electrostatic potential charges in gas phase | Debye- $\text{\AA}^2$ |
| mepcGasHexadecapoleMomentsXXXX  | XXXX hexadecapole moment from electrostatic potential charges in gas phase          | Debye- $\text{\AA}^3$ |
| mepcGasHexadecapoleMomentsXXXY  | XXXY hexadecapole moment from electrostatic potential charges in gas phase          | Debye- $\text{\AA}^3$ |
| mepcGasHexadecapoleMomentsXXXZ  | XXXZ hexadecapole moment from electrostatic potential charges in gas phase          | Debye- $\text{\AA}^3$ |
| mepcGasHexadecapoleMomentsXXYY  | XXYY hexadecapole moment from electrostatic potential charges in gas phase          | Debye- $\text{\AA}^3$ |
| mepcGasHexadecapoleMomentsXXYZ  | XXYZ hexadecapole moment from electrostatic potential charges in gas phase          | Debye- $\text{\AA}^3$ |
| mepcGasHexadecapoleMomentsXXZZ  | XXZZ hexadecapole moment from electrostatic potential charges in gas phase          | Debye- $\text{\AA}^3$ |
| mepcGasHexadecapoleMomentsYYXZ  | YYXZ hexadecapole moment from electrostatic potential charges in gas phase          | Debye- $\text{\AA}^3$ |
| mepcGasHexadecapoleMomentsYYYYX | YYYYX hexadecapole moment from electrostatic potential charges in gas phase         | Debye- $\text{\AA}^3$ |
| mepcGasHexadecapoleMomentsYYYYY | YYYYY hexadecapole moment from electrostatic potential charges in gas phase         | Debye- $\text{\AA}^3$ |
| mepcGasHexadecapoleMomentsYYYYZ | YYYYZ hexadecapole moment from electrostatic potential charges in gas phase         | Debye- $\text{\AA}^3$ |
| mepcGasHexadecapoleMomentsYYZZ  | YYZZ hexadecapole moment from electrostatic potential charges in gas phase          | Debye- $\text{\AA}^3$ |
| mepcGasHexadecapoleMomentsZZXY  | ZZXY hexadecapole moment from electrostatic potential charges in gas phase          | Debye- $\text{\AA}^3$ |
| mepcGasHexadecapoleMomentsZZZX  | ZZZX hexadecapole moment from electrostatic potential charges in gas phase          | Debye- $\text{\AA}^3$ |
| mepcGasHexadecapoleMomentsZZZY  | ZZZY hexadecapole moment from electrostatic potential charges in gas phase          | Debye- $\text{\AA}^3$ |

|                                |                                                                                              |                      |
|--------------------------------|----------------------------------------------------------------------------------------------|----------------------|
| mepcGasHexadecapoleMomentsZZZZ | ZZZZ hexadecapole moment from electrostatic potential charges in gas phase                   | Debye-Å <sup>3</sup> |
| mepcDipoleMomentsTot           | Total dipole moment from electrostatic potential charges in solution phase                   | Debye                |
| mepcDipoleMomentsX             | X dipole moment from electrostatic potential charges in solution phase                       | Debye                |
| mepcDipoleMomentsY             | Y dipole moment from electrostatic potential charges in solution phase                       | Debye                |
| mepcDipoleMomentsZ             | Z dipole moment from electrostatic potential charges in solution phase                       | Debye                |
| mepcQuadrupoleMomentsXX        | XX quadrupole moment from electrostatic potential charges in solution phase                  | Debye-Å              |
| mepcQuadrupoleMomentsXY        | XY quadrupole moment from electrostatic potential charges in solution phase                  | Debye-Å              |
| mepcQuadrupoleMomentsXZ        | XZ quadrupole moment from electrostatic potential charges in solution phase                  | Debye-Å              |
| mepcQuadrupoleMomentsYY        | YY quadrupole moment from electrostatic potential charges in solution phase                  | Debye-Å              |
| mepcQuadrupoleMomentsYZ        | YZ quadrupole moment from electrostatic potential charges in solution phase                  | Debye-Å              |
| mepcQuadrupoleMomentsZZ        | ZZ quadrupole moment from electrostatic potential charges in solution phase                  | Debye-Å              |
| mepcTracelessQuadrupoleXY      | XY traceless quadrupole moment from electrostatic potential charges in solution phase        | Debye-Å              |
| mepcTracelessQuadrupoleXZ      | XZ traceless quadrupole moment from electrostatic potential charges in solution phase        | Debye-Å              |
| mepcTracelessQuadrupoleYZ      | YZ traceless quadrupole moment from electrostatic potential charges in solution phase        | Debye-Å              |
| mepcTracelessQuadrupoleXXYY    | XX-YY traceless quadrupole moment from electrostatic potential charges in solution phase     | Debye-Å              |
| mepcTracelessQuadrupole2ZZXXYY | 2ZZ-XX-YY traceless quadrupole moment from electrostatic potential charges in solution phase | Debye-Å              |
| mepcOctapoleMomentsXXX         | XXX octapole moment from electrostatic potential charges in solution phase                   | Debye-Å <sup>2</sup> |
| mepcOctapoleMomentsXXY         | XXY octapole moment from electrostatic potential charges in solution phase                   | Debye-Å <sup>2</sup> |
| mepcOctapoleMomentsXXZ         | XXZ octapole moment from electrostatic potential charges in solution phase                   | Debye-Å <sup>2</sup> |
| mepcOctapoleMomentsXYY         | XYY octapole moment from electrostatic potential charges in solution phase                   | Debye-Å <sup>2</sup> |
| mepcOctapoleMomentsXYZ         | XYZ octapole moment from electrostatic potential charges in solution phase                   | Debye-Å <sup>2</sup> |
| mepcOctapoleMomentsXZZ         | XZZ octapole moment from electrostatic potential charges in solution phase                   | Debye-Å <sup>2</sup> |
| mepcOctapoleMomentsYYY         | YYY octapole moment from electrostatic potential charges in solution phase                   | Debye-Å <sup>2</sup> |
| mepcOctapoleMomentsYYZ         | YYZ octapole moment from electrostatic potential charges in solution phase                   | Debye-Å <sup>2</sup> |
| mepcOctapoleMomentsYZZ         | YZZ octapole moment from electrostatic potential charges in solution phase                   | Debye-Å <sup>2</sup> |
| mepcOctapoleMomentsZZZ         | ZZZ octapole moment from electrostatic potential charges in solution phase                   | Debye-Å <sup>2</sup> |
| mepcTracelessOctapoleXXX       | XXX traceless octapole moment from electrostatic potential charges in solution phase         | Debye-Å <sup>2</sup> |

|                              |                                                                                          |                       |
|------------------------------|------------------------------------------------------------------------------------------|-----------------------|
| mepcTracelessOctapoleXYZ     | XYZ traceless octapole moment from electrostatic potential charges in solution phase     | Debye- $\text{\AA}^2$ |
| mepcTracelessOctapoleYYY     | YYY traceless octapole moment from electrostatic potential charges in solution phase     | Debye- $\text{\AA}^2$ |
| mepcTracelessOctapoleZZZ     | ZZZ traceless octapole moment from electrostatic potential charges in solution phase     | Debye- $\text{\AA}^2$ |
| mepcTracelessOctapoleXXYYZZ  | XXY-YZZ traceless octapole moment from electrostatic potential charges in solution phase | Debye- $\text{\AA}^2$ |
| mepcTracelessOctapoleXXZYYZ  | XXZ-YYZ traceless octapole moment from electrostatic potential charges in solution phase | Debye- $\text{\AA}^2$ |
| mepcTracelessOctapoleXYYXZZ  | XYY-XZZ traceless octapole moment from electrostatic potential charges in solution phase | Debye- $\text{\AA}^2$ |
| mepcHexadecapoleMomentsXXXX  | XXXX hexadecapole moment from electrostatic potential charges in solution phase          | Debye- $\text{\AA}^3$ |
| mepcHexadecapoleMomentsXXX Y | XXX Y hexadecapole moment from electrostatic potential charges in solution phase         | Debye- $\text{\AA}^3$ |
| mepcHexadecapoleMomentsXXX Z | XXX Z hexadecapole moment from electrostatic potential charges in solution phase         | Debye- $\text{\AA}^3$ |
| mepcHexadecapoleMomentsXXYY  | XXYY hexadecapole moment from electrostatic potential charges in solution phase          | Debye- $\text{\AA}^3$ |
| mepcHexadecapoleMomentsXXYZ  | XXYZ hexadecapole moment from electrostatic potential charges in solution phase          | Debye- $\text{\AA}^3$ |
| mepcHexadecapoleMomentsXXZZ  | XXZZ hexadecapole moment from electrostatic potential charges in solution phase          | Debye- $\text{\AA}^3$ |
| mepcHexadecapoleMomentsYYXZ  | YYXZ hexadecapole moment from electrostatic potential charges in solution phase          | Debye- $\text{\AA}^3$ |
| mepcHexadecapoleMomentsYYYX  | YYYX hexadecapole moment from electrostatic potential charges in solution phase          | Debye- $\text{\AA}^3$ |
| mepcHexadecapoleMomentsYYYY  | YYYY hexadecapole moment from electrostatic potential charges in solution phase          | Debye- $\text{\AA}^3$ |
| mepcHexadecapoleMomentsYYYYZ | YYYYZ hexadecapole moment from electrostatic potential charges in solution phase         | Debye- $\text{\AA}^3$ |
| mepcHexadecapoleMomentsYYZZ  | YYZZ hexadecapole moment from electrostatic potential charges in solution phase          | Debye- $\text{\AA}^3$ |
| mepcHexadecapoleMomentsZZXY  | ZZXY hexadecapole moment from electrostatic potential charges in solution phase          | Debye- $\text{\AA}^3$ |
| mepcHexadecapoleMomentsZZZX  | ZZZX hexadecapole moment from electrostatic potential charges in solution phase          | Debye- $\text{\AA}^3$ |
| mepcHexadecapoleMomentsZZZY  | ZZZY hexadecapole moment from electrostatic potential charges in solution phase          | Debye- $\text{\AA}^3$ |
| mepcHexadecapoleMomentsZZZZ  | ZZZZ hexadecapole moment from electrostatic potential charges in solution phase          | Debye- $\text{\AA}^3$ |
| mmcGasDipoleMomentsTot       | Total dipole moments from Mulliken charges in gas phase                                  | Debye                 |
| mmcGasDipoleMomentsX         | X dipole moments from Mulliken charges in gas phase                                      | Debye                 |
| mmcGasDipoleMomentsY         | Y dipole moments from Mulliken charges in gas phase                                      | Debye                 |
| mmcGasDipoleMomentsZ         | Z dipole moments from Mulliken charges in gas phase                                      | Debye                 |
| mmcGasQuadrupoleMomentsXX    | XX quadrupole moments from Mulliken charges in gas phase                                 | Debye- $\text{\AA}$   |
| mmcGasQuadrupoleMomentsXY    | XY quadrupole moments from Mulliken charges in gas phase                                 | Debye- $\text{\AA}$   |

|                                  |                                                                           |                       |
|----------------------------------|---------------------------------------------------------------------------|-----------------------|
| mmcGasQuadrupoleMomentsXZ        | XZ quadrupole moments from Mulliken charges in gas phase                  | Debye- $\text{\AA}$   |
| mmcGasQuadrupoleMomentsYY        | YY quadrupole moments from Mulliken charges in gas phase                  | Debye- $\text{\AA}$   |
| mmcGasQuadrupoleMomentsYZ        | YZ quadrupole moments from Mulliken charges in gas phase                  | Debye- $\text{\AA}$   |
| mmcGasQuadrupoleMomentsZZ        | ZZ quadrupole moments from Mulliken charges in gas phase                  | Debye- $\text{\AA}$   |
| mmcGasTracelessQuadrupoleXY      | XY traceless quadrupole moments from Mulliken charges in gas phase        | Debye- $\text{\AA}^2$ |
| mmcGasTracelessQuadrupoleXZ      | XZ traceless quadrupole moments from Mulliken charges in gas phase        | Debye- $\text{\AA}^2$ |
| mmcGasTracelessQuadrupoleYZ      | YZ traceless quadrupole moments from Mulliken charges in gas phase        | Debye- $\text{\AA}^2$ |
| mmcGasTracelessQuadrupoleXXYY    | XX-YY traceless quadrupole moments from Mulliken charges in gas phase     | Debye- $\text{\AA}^2$ |
| mmcGasTracelessQuadrupole2ZZXXYY | ZZZ-XX-YY traceless quadrupole moments from Mulliken charges in gas phase | Debye- $\text{\AA}^2$ |
| mmcGasOctapoleMomentsXXX         | XXX octapole moments from Mulliken charges in gas phase                   | Debye- $\text{\AA}^2$ |
| mmcGasOctapoleMomentsXXY         | XXY octapole moments from Mulliken charges in gas phase                   | Debye- $\text{\AA}^2$ |
| mmcGasOctapoleMomentsXXZ         | XXZ octapole moments from Mulliken charges in gas phase                   | Debye- $\text{\AA}^2$ |
| mmcGasOctapoleMomentsXYY         | XYY octapole moments from Mulliken charges in gas phase                   | Debye- $\text{\AA}^2$ |
| mmcGasOctapoleMomentsXYZ         | XYZ octapole moments from Mulliken charges in gas phase                   | Debye- $\text{\AA}^2$ |
| mmcGasOctapoleMomentsXZZ         | XZZ octapole moments from Mulliken charges in gas phase                   | Debye- $\text{\AA}^2$ |
| mmcGasOctapoleMomentsYYY         | YYY octapole moments from Mulliken charges in gas phase                   | Debye- $\text{\AA}^2$ |
| mmcGasOctapoleMomentsYYZ         | YYZ octapole moments from Mulliken charges in gas phase                   | Debye- $\text{\AA}^2$ |
| mmcGasOctapoleMomentsYZZ         | YZZ octapole moments from Mulliken charges in gas phase                   | Debye- $\text{\AA}^2$ |
| mmcGasOctapoleMomentsZZZ         | ZZZ octapole moments from Mulliken charges in gas phase                   | Debye- $\text{\AA}^2$ |
| mmcGasTracelessOctapoleXXX       | XXX traceless octapole moments from Mulliken charges in gas phase         | Debye- $\text{\AA}^2$ |
| mmcGasTracelessOctapoleXYZ       | XYZ traceless octapole moments from Mulliken charges in gas phase         | Debye- $\text{\AA}^2$ |
| mmcGasTracelessOctapoleYYY       | YYY traceless octapole moments from Mulliken charges in gas phase         | Debye- $\text{\AA}^2$ |
| mmcGasTracelessOctapoleZZZ       | ZZZ traceless octapole moments from Mulliken charges in gas phase         | Debye- $\text{\AA}^2$ |
| mmcGasTracelessOctapoleXXYYZZ    | XXY-YZZ traceless octapole moments from Mulliken charges in gas phase     | Debye- $\text{\AA}^2$ |
| mmcGasTracelessOctapoleXXZYZZ    | XXZ-YYZ traceless octapole moments from Mulliken charges in gas phase     | Debye- $\text{\AA}^2$ |
| mmcGasTracelessOctapoleXYYXZZ    | XYY-XZZ traceless octapole moments from Mulliken charges in gas phase     | Debye- $\text{\AA}^2$ |
| mmcGasHexadecapoleMomentsXXXX    | XXXX hexadecapole moments from Mulliken charges in gas phase              | Debye- $\text{\AA}^3$ |
| mmcGasHexadecapoleMomentsXXXY    | XXXY hexadecapole moments from Mulliken charges in gas phase              | Debye- $\text{\AA}^3$ |

|                                |                                                                                |                       |
|--------------------------------|--------------------------------------------------------------------------------|-----------------------|
| mmcGasHexadecapoleMomentsXXXXZ | XXXXZ hexadecapole moments from Mulliken charges in gas phase                  | Debye- $\text{\AA}^3$ |
| mmcGasHexadecapoleMomentsXXYY  | XXYY hexadecapole moments from Mulliken charges in gas phase                   | Debye- $\text{\AA}^3$ |
| mmcGasHexadecapoleMomentsXXYZ  | XXYZ hexadecapole moments from Mulliken charges in gas phase                   | Debye- $\text{\AA}^3$ |
| mmcGasHexadecapoleMomentsXXZZ  | XXZZ hexadecapole moments from Mulliken charges in gas phase                   | Debye- $\text{\AA}^3$ |
| mmcGasHexadecapoleMomentsYYXZ  | YYXZ hexadecapole moments from Mulliken charges in gas phase                   | Debye- $\text{\AA}^3$ |
| mmcGasHexadecapoleMomentsYYYYX | YYYYX hexadecapole moments from Mulliken charges in gas phase                  | Debye- $\text{\AA}^3$ |
| mmcGasHexadecapoleMomentsYYYYY | YYYYY hexadecapole moments from Mulliken charges in gas phase                  | Debye- $\text{\AA}^3$ |
| mmcGasHexadecapoleMomentsYYYYZ | YYYYZ hexadecapole moments from Mulliken charges in gas phase                  | Debye- $\text{\AA}^3$ |
| mmcGasHexadecapoleMomentsYYZZ  | YYZZ hexadecapole moments from Mulliken charges in gas phase                   | Debye- $\text{\AA}^3$ |
| mmcGasHexadecapoleMomentsZZXY  | ZZXY hexadecapole moments from Mulliken charges in gas phase                   | Debye- $\text{\AA}^3$ |
| mmcGasHexadecapoleMomentsZZZX  | ZZZX hexadecapole moments from Mulliken charges in gas phase                   | Debye- $\text{\AA}^3$ |
| mmcGasHexadecapoleMomentsZZZY  | ZZZY hexadecapole moments from Mulliken charges in gas phase                   | Debye- $\text{\AA}^3$ |
| mmcGasHexadecapoleMomentsZZZZ  | ZZZZ hexadecapole moments from Mulliken charges in gas phase                   | Debye- $\text{\AA}^3$ |
| mmcDipoleMomentsTot            | Total dipole moments from Mulliken charges in solution phase                   | Debye                 |
| mmcDipoleMomentsX              | X dipole moments from Mulliken charges in solution phase                       | Debye                 |
| mmcDipoleMomentsY              | Y dipole moments from Mulliken charges in solution phase                       | Debye                 |
| mmcDipoleMomentsZ              | Z dipole moments from Mulliken charges in solution phase                       | Debye                 |
| mmcQuadrupoleMomentsXX         | XX quadrupole moments from Mulliken charges in solution phase                  | Debye- $\text{\AA}$   |
| mmcQuadrupoleMomentsXY         | XY quadrupole moments from Mulliken charges in solution phase                  | Debye- $\text{\AA}$   |
| mmcQuadrupoleMomentsXZ         | XZ quadrupole moments from Mulliken charges in solution phase                  | Debye- $\text{\AA}$   |
| mmcQuadrupoleMomentsYY         | YY quadrupole moments from Mulliken charges in solution phase                  | Debye- $\text{\AA}$   |
| mmcQuadrupoleMomentsYZ         | YZ quadrupole moments from Mulliken charges in solution phase                  | Debye- $\text{\AA}$   |
| mmcQuadrupoleMomentsZZ         | ZZ quadrupole moments from Mulliken charges in solution phase                  | Debye- $\text{\AA}$   |
| mmcTracelessQuadrupoleXY       | XY traceless quadrupole moments from Mulliken charges in solution phase        | Debye- $\text{\AA}$   |
| mmcTracelessQuadrupoleXZ       | XZ traceless quadrupole moments from Mulliken charges in solution phase        | Debye- $\text{\AA}$   |
| mmcTracelessQuadrupoleYZ       | YZ traceless quadrupole moments from Mulliken charges in solution phase        | Debye- $\text{\AA}$   |
| mmcTracelessQuadrupoleXXYY     | XX-YY traceless quadrupole moments from Mulliken charges in solution phase     | Debye- $\text{\AA}$   |
| mmcTracelessQuadrupole2ZZXXYY  | 2ZZ-XX-YY traceless quadrupole moments from Mulliken charges in solution phase | Debye- $\text{\AA}$   |

|                             |                                                                            |                       |
|-----------------------------|----------------------------------------------------------------------------|-----------------------|
| mmcOctapoleMomentsXXX       | XXX octapole moments from Mulliken charges in solution phase               | Debye- $\text{\AA}^2$ |
| mmcOctapoleMomentsXXY       | XXY octapole moments from Mulliken charges in solution phase               | Debye- $\text{\AA}^2$ |
| mmcOctapoleMomentsXXZ       | XXZ octapole moments from Mulliken charges in solution phase               | Debye- $\text{\AA}^2$ |
| mmcOctapoleMomentsXYY       | XYY octapole moments from Mulliken charges in solution phase               | Debye- $\text{\AA}^2$ |
| mmcOctapoleMomentsXYZ       | XYZ octapole moments from Mulliken charges in solution phase               | Debye- $\text{\AA}^2$ |
| mmcOctapoleMomentsXZZ       | XZZ octapole moments from Mulliken charges in solution phase               | Debye- $\text{\AA}^2$ |
| mmcOctapoleMomentsYYY       | YYY octapole moments from Mulliken charges in solution phase               | Debye- $\text{\AA}^2$ |
| mmcOctapoleMomentsYYZ       | YYZ octapole moments from Mulliken charges in solution phase               | Debye- $\text{\AA}^2$ |
| mmcOctapoleMomentsYZZ       | YZZ octapole moments from Mulliken charges in solution phase               | Debye- $\text{\AA}^2$ |
| mmcOctapoleMomentsZZZ       | ZZZ octapole moments from Mulliken charges in solution phase               | Debye- $\text{\AA}^2$ |
| mmcTracelessOctapoleXXX     | XXX traceless octapole moments from Mulliken charges in solution phase     | Debye- $\text{\AA}^2$ |
| mmcTracelessOctapoleXYZ     | XYZ traceless octapole moments from Mulliken charges in solution phase     | Debye- $\text{\AA}^2$ |
| mmcTracelessOctapoleYYY     | YYY traceless octapole moments from Mulliken charges in solution phase     | Debye- $\text{\AA}^2$ |
| mmcTracelessOctapoleZZZ     | ZZZ traceless octapole moments from Mulliken charges in solution phase     | Debye- $\text{\AA}^2$ |
| mmcTracelessOctapoleXXYYZZ  | XXY-YYZ traceless octapole moments from Mulliken charges in solution phase | Debye- $\text{\AA}^2$ |
| mmcTracelessOctapoleXXZYYZ  | XXZ-YYZ traceless octapole moments from Mulliken charges in solution phase | Debye- $\text{\AA}^2$ |
| mmcTracelessOctapoleXYYXZZ  | XYY-XZZ traceless octapole moments from Mulliken charges in solution phase | Debye- $\text{\AA}^2$ |
| mmcHexadecapoleMomentsXXXX  | XXXX hexadecapole moments from Mulliken charges in solution phase          | Debye- $\text{\AA}^3$ |
| mmcHexadecapoleMomentsXXXY  | XXXY hexadecapole moments from Mulliken charges in solution phase          | Debye- $\text{\AA}^3$ |
| mmcHexadecapoleMomentsXXXZ  | XXXZ hexadecapole moments from Mulliken charges in solution phase          | Debye- $\text{\AA}^3$ |
| mmcHexadecapoleMomentsXXYY  | XXYY hexadecapole moments from Mulliken charges in solution phase          | Debye- $\text{\AA}^3$ |
| mmcHexadecapoleMomentsXXYZ  | XXYZ hexadecapole moments from Mulliken charges in solution phase          | Debye- $\text{\AA}^3$ |
| mmcHexadecapoleMomentsXXZZ  | XXZZ hexadecapole moments from Mulliken charges in solution phase          | Debye- $\text{\AA}^3$ |
| mmcHexadecapoleMomentsYYXZ  | YYXZ hexadecapole moments from Mulliken charges in solution phase          | Debye- $\text{\AA}^3$ |
| mmcHexadecapoleMomentsYYXX  | YYXX hexadecapole moments from Mulliken charges in solution phase          | Debye- $\text{\AA}^3$ |
| mmcHexadecapoleMomentsYYYY  | YYYY hexadecapole moments from Mulliken charges in solution phase          | Debye- $\text{\AA}^3$ |
| mmcHexadecapoleMomentsYYYYZ | YYYYZ hexadecapole moments from Mulliken charges in solution phase         | Debye- $\text{\AA}^3$ |
| mmcHexadecapoleMomentsYYZZ  | YYZZ hexadecapole moments from Mulliken charges in solution phase          | Debye- $\text{\AA}^3$ |

|                            |                                                                   |                      |
|----------------------------|-------------------------------------------------------------------|----------------------|
| mmcHexadecapoleMomentsZZXY | ZZXY hexadecapole moments from Mulliken charges in solution phase | Debye-Å <sup>3</sup> |
| mmcHexadecapoleMomentsZZZX | ZZZX hexadecapole moments from Mulliken charges in solution phase | Debye-Å <sup>3</sup> |
| mmcHexadecapoleMomentsZZZY | ZZZY hexadecapole moments from Mulliken charges in solution phase | Debye-Å <sup>3</sup> |
| mmcHexadecapoleMomentsZZZZ | ZZZZ hexadecapole moments from Mulliken charges in solution phase | Debye-Å <sup>3</sup> |

Table S2: Explanation of the data columns that are present in RedDB's additional data tables. Descriptions of data columns have been provided alongside the units, whenever applicable, for the different data types.
